# Supplementary material for: AtomNet PoseRanker: Enriching Ligand Pose Quality for Dynamic Proteins in Virtual High-Throughput Screens
Source: PubMed Central journal article supplement (PMC8924924; doi:10.1021/acs.jcim.1c01250), 2022-03-02
Supplement: ci1c01250_si_001.pdf [file ci1c01250_si_001.pdf]

## Supporting Information for:

# AtomNet PoseRanker: Enriching Ligand Pose Quality for Dynamic Proteins in Virtual High Throughput Screens

Kate A. Stafford<sup>1</sup>, Brandon M. Anderson<sup>1</sup>, Jon Sorenson<sup>1</sup>, and Henry van den Bedem<sup>1,2,\*</sup>

Atomwise, Inc., 717 Market Street, Suite 800, San Francisco, CA 94103, USA.  
Department of Bioengineering and Therapeutic Sciences, University of California, San Francisco, San Francisco, CA 94158, USA.

## Rosetta Protocols

```
<ROSETTASCRIPTS>
  <SCOREFXNS>
    <ScoreFunction name="s3" weights="score3"/>
    <ScoreFunction name="s4" weights="score4_smooth_cart"/>
    <ScoreFunction name="fa" weights="ref2015_cart" >
      <Reweight scoretype="metalbinding_constraint" weight="1.0" />
    </ScoreFunction>
    <ScoreFunction name="r15" weights="ref2015" >
      <Reweight scoretype="pro_close" weight="0.0" />
    </ScoreFunction>
    <ScoreFunction name="cen" weights="cen_std"/>
  </SCOREFXNS>

  <MOVERS>
    <SetupMetalsMover name="metals" />
    <Hybridize name="hybridize" batch="1" stage1_increase_cycles="1.0"
stage2_increase_cycles="1.0" stage1_scorefxn="s3" stage2_scorefxn="s4"
fa_scorefxn="fa" fragprob_stage2="0.0" add_hetatm="1"
hetatm_to_protein_cst_weight="1.0" hetatm_cst_weight="1.0" stage2_temperature="0.5">
      <Template pdb="test_with_lig.pdb" cst_file="AUTO" weight="1.000" />

    </Hybridize>
    <FastRelax name="relax" scorefxn="fa" />
  </MOVERS>
</ROSETTASCRIPTS>
```

Table S1. AtomNet PoseRanker model hyperparameters

| <b>Parameter description</b>               | <b>Value</b>             |
|--------------------------------------------|--------------------------|
| Minibatch size                             | 64                       |
| Optimizer                                  | adam                     |
| Learning rate                              | 0.001                    |
| Activation function                        | LeakyReLU                |
| Radial thresholds                          | 10Å (l→l, r→l), 5Å (l→r) |
| Radial filter resolution ( $\delta_r$ )    | 0.15625                  |
| Atom dropout                               | 0.15                     |
| Edge dropout                               | 0.15                     |
| Atom embedding initial embedding dimension | 32                       |
| Message passing output filters             | 256                      |
| Atom update hidden layer sizes             | 256                      |
| Readout layer hidden layer sizes           | 512                      |

We trained the model by sampling a 1:1 ratio of positive to negative examples for a total of 1 million iterations, sufficient to ensure convergence for all models.

## Modifications to smina

We exposed the number of Monte Carlo steps as a user parameter by adding the following changes to the file `src/main/main.cpp`:

### Line 67:

```
double steps_fraction;  
int mc_steps;
```

### Line 76:

```
steps_fraction(1), score_only(false), randomize_only(false), local_only(false),  
dominimize(false), include_atom_info(false), mc_steps(-1)
```

### Line 418:

```
par.mc.num_steps = unsigned(par.mc.num_steps * settings.steps_fraction);  
if (settings.mc_steps > -1) // if present, --mc_steps overrides --steps_fraction  
    par.mc.num_steps = (unsigned) settings.mc_steps;
```

### Line 994:

```
("steps_fraction", value<double>(&settings.steps_fraction)->default_value(1.0),  
    "fraction of mc steps to perform (i.e. 1 is normal length)")  
("mc_steps", value<int>(&settings.mc_steps)->default_value(-1),  
    "number of mc steps to take (if >= 0 then overrides steps_fraction)")
```
